# Supplementary material for: Nucleation and crystal growth of barium sulfate: inhibition in the presence of rigid and flexible triphosphonate additives
Source: Royal Society of Chemistry journal article supplement (doi:10.1039/c8ce01116h), 2018-01-01
Supplement: c8ce01116h1.pdf [file c8ce01116h1.pdf]

# Supporting Information

For

## Barium Sulfate Scale Formation and Inhibition in the Presence of Rigid and Flexible Triphosphonate Additives

E.D. Athanasopoulos, E. Armakola, P.G. Koutsoukos, K.D. Demadis

Table with equilibria used for the calculation of supersaturation, cif file for

**[Ba(H<sub>4</sub>BTP)(H<sub>2</sub>O)<sub>4</sub>]<sub>n</sub>.**

| <b>Equilibrium</b>                                                                                                | <b>Logk</b> |
|-------------------------------------------------------------------------------------------------------------------|-------------|
| $\text{H}_2\text{O} \Leftrightarrow \text{H}^+ + \text{OH}^-$                                                     | -13,997     |
| $\text{Ba}^{2+} + \text{H}_2\text{O} \Leftrightarrow \text{BaOH}^+ + \text{H}^+$                                  | -13,357     |
| $\text{H}^+ + \text{SO}_4^{2-} \Leftrightarrow \text{HSO}_4^{2-}$                                                 | 1,99        |
| $\text{Na}^+ + \text{SO}_4^{2-} \Leftrightarrow \text{NaSO}_4^-$                                                  | 0,73        |
| $\text{NaSO}_4^- \cdot 10\text{H}_2\text{O} \Leftrightarrow \text{Na}^+ + \text{SO}_4^{2-} + 2\text{H}_2\text{O}$ | -1,114      |
| $\text{Na}_2\text{SO}_4 \Leftrightarrow 2\text{Na}^+ + \text{SO}_4^{2-}$                                          | 0,3217      |
| $\text{NaCl} \Leftrightarrow \text{Na}^+ + \text{Cl}^-$                                                           | 1,6025      |
| $\text{BaSO}_4 \Leftrightarrow \text{Ba}^{2+} + \text{SO}_4^{2-}$                                                 | -9,98       |
| (AMP) $\text{HN}^+ \text{-H}_6\text{L} \Leftrightarrow \text{H}^+ + \text{N-H}_6\text{L}$                         | -4,32       |
| $\text{HN}^+ \text{-H}_6\text{L} \Leftrightarrow \text{H}^+ + \text{HN}^+ \text{-H}_5\text{L}^-$                  | 1,08        |
| $\text{HN}^+ \text{-H}_5\text{L}^- \Leftrightarrow \text{H}^+ + \text{HN}^+ \text{-H}_4\text{L}^{2-}$             | 1,56        |
| $\text{HN}^+ \text{-H}_4\text{L}^{2-} \Leftrightarrow \text{H}^+ + \text{HN}^+ \text{-H}_3\text{L}^{3-}$          | 2,04        |
| $\text{HN}^+ \text{-H}_3\text{L}^{3-} \Leftrightarrow \text{H}^+ + \text{HN}^+ \text{-H}_2\text{L}^{4-}$          | 7,60        |
| $\text{HN}^+ \text{-H}_2\text{L}^{4-} \Leftrightarrow \text{H}^+ + \text{HN}^+ \text{-HL}^{5-}$                   | 8,08        |
| $\text{HN}^+ \text{-HL}^{5-} \Leftrightarrow \text{H}^+ + \text{N-L}^{6-}$                                        | 8,56        |
| (BTP) $\text{H}_6\text{M} \Leftrightarrow 4\text{H}^+ + \text{H}_2\text{M}^{4-}$                                  | 3,45        |
| $\text{H}_2\text{M}^{4-} \Leftrightarrow 2\text{H}^+ + \text{M}^{6-}$                                             | 8,68        |
